# Supplementary material
Source: PubMed Central journal article supplement (PMC2176129)
Supplement: ajrcmb_38_1_78__1.pdf [file ajrcmb_38_1_78__1.pdf]

**Plasminogen Activation–Induced Pericellular Fibronectin Proteolysis  
Promotes Fibroblast Apoptosis**

**Jeffrey C. Horowitz, David S. Rogers, Richard H. Simon, Thomas H. Sisson, and  
Victor J. Thannickal**

Division of Pulmonary and Critical Care Medicine, Department of Medicine, University  
of Michigan Medical Center, Ann Arbor, Michigan

**Online Data Supplement**

**Figure E1**

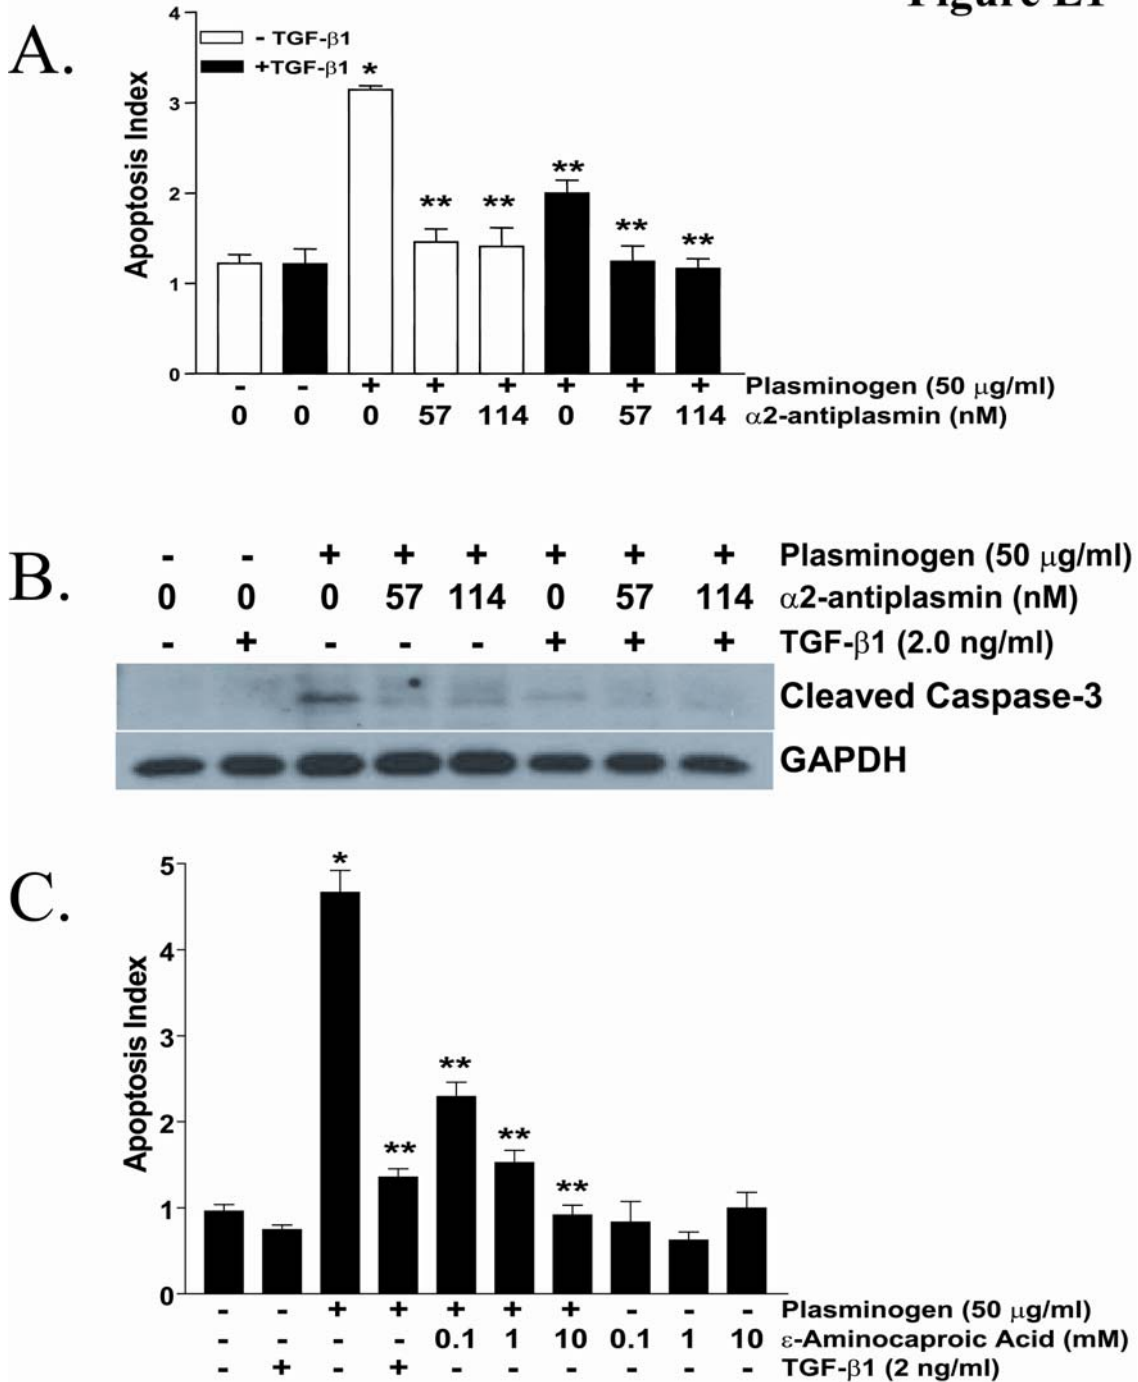

**Figure E1: Inhibition of plasminogen activation or plasmin activity blocks plasminogen-mediated fibroblast apoptosis.** (A and B) IMR-90 fibroblasts were treated with/without plasminogen (50 µg/ml) ± TGF-β1 (2 ng/ml) and/or the indicated concentrations of α2-antiplasmin for 18 hours. Apoptosis was assessed by (A) ELISA for ssDNA (n = 4; \* p < 0.001 vs. control, \*\* p < 0.001 vs. plasminogen alone) and (B) Western immunoblotting for cleaved caspase-3. (C) IMR-90 fibroblasts were treated with/without plasminogen (50 µg/ml) in the presence/absence of the indicated doses of the lysine analog, ε-aminocaproic acid or TGF-β1 (2 ng/ml) for 18 hours, and apoptosis was assessed by ELISA for ssDNA. n = 4, \* p < 0.001 vs. control, \*\* p < 0.001 vs. plasminogen treatment alone.
